# Supplementary material
Source: Elsevier journal article supplement (https://www.sciencedirect.com/science/article/pii/S0300893217305298)

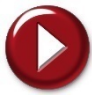

## Supplementary material

## Tricuspid but not Mitral Regurgitation Determines Mortality After TAVR in Patients With Nonsevere Mitral Regurgitation

**Table 1 of the supplementary material**

Main Predictors of the Improvement in Mitral Regurgitation

|                                   | n       | MR persistence<br>n = 614 | MR improvement<br>n = 197 | P    |
|-----------------------------------|---------|---------------------------|---------------------------|------|
| <i>Baseline characteristics</i>   |         |                           |                           |      |
| Sex, male                         | 614/197 | 217 (35.3)                | 73 (37.1)                 | .662 |
| Diabetes mellitus                 | 606/193 | 230 (38)                  | 74 (38.3)                 | .923 |
| Hypertension                      | 607/193 | 508 (83.7)                | 150 (77.7)                | .059 |
| Dyslipidemia                      | 444/120 | 250 (56.3)                | 61 (50.8)                 | .285 |
| Coronary artery disease           | 601/193 | 246 (40.9)                | 80 (41.5)                 | .899 |
| Previous PCI                      | 607/193 | 151 (24.9)                | 43 (22.3)                 | .463 |
| Previous open heart surgery       | 605/193 | 68 (11.2)                 | 27 (14)                   | .304 |
| Chronic kidney disease            | 444/120 | 115 (25.9)                | 23 (19.2)                 | .128 |
| Previous atrial fibrillation      | 560/190 | 160 (28.6)                | 41 (21.6)                 | .060 |
| <i>Echocardiographic findings</i> |         |                           |                           |      |
| Aortic peak gradient, mmHg        | 589/182 | 77.8 ± 23.2               | 78.9 ± 22.7               | .544 |
| Aortic mean gradient, mmHg        | 586/182 | 48.8 ± 16.2               | 46.8 ± 14.1               | .191 |

|                                    |         |             |             |                  |
|------------------------------------|---------|-------------|-------------|------------------|
| LVEF, %                            | 599/186 | 59.9 ± 14.2 | 55.6 ± 13.1 | <b>&lt; .001</b> |
| Aortic valve area, cm <sup>2</sup> | 601/176 | 21.9 ± 2.2  | 21.8 ± 2.3  | .601             |
| TR ≥ 2                             | 612/196 | 133 (21.7)  | 75 (38.3)   | <b>&lt; .001</b> |
| Organic MR                         | 549/179 | 469 (85.4)  | 41 (22.9)   | <b>&lt; .001</b> |
| <i>Procedural factors</i>          |         |             |             |                  |
| Balloon valvuloplasty              | 573/197 | 427 (74.5)  | 177 (89.8)  | <b>&lt; .001</b> |
| Self-expandable TAVI               | 608/193 | 464 (76.3)  | 144 (74.6)  | .630             |
| Successful device implantation     | 601/193 | 577 (96)    | 183 (94.8)  | .478             |
| <i>In-hospital outcomes</i>        |         |             |             |                  |
| PPMI                               | 538/172 | 117 (21.7)  | 56 (32.6)   | <b>.004</b>      |
| NOAF                               | 351/179 | 37 (10.5)   | 11 (6.1)    | .095             |
| LBBB at discharge                  | 358/179 | 185 (51.7)  | 57 (31.8)   | <b>&lt; .001</b> |

LBBB, left bundle branch block; LVEF, left ventricular ejection fraction; MR, mitral regurgitation; NOAF, new onset atrial fibrillation; PCI, percutaneous coronary intervention; PPMI, permanent pacemaker implantation; TAVI, transcatheter aortic valve implantation; TR, tricuspid regurgitation.

Data are expressed as mean ± standard deviation or No. (%).

**Table 2 of the supplementary material**

Main Baseline Characteristics in Patients With Respect to Tricuspid Regurgitation Grade

|                                    | TR < 2<br>n = 602 | TR ≥ 2<br>n = 208 | P           |
|------------------------------------|-------------------|-------------------|-------------|
| <i>Baseline characteristics</i>    |                   |                   |             |
| Age, y                             | 80.7 ± 6.6        | 80.9 ± 7.6        | .449        |
| Sex, male                          | 220/602 (36.5)    | 70/208 (33.7)     | .453        |
| BMI, kg/m <sup>2</sup>             | 28.4 ± 5          | 28.8 ± 5.8        | .362        |
| STS score, %                       | 6.6 ± 4.1         | 8.5 ± 8.1         | .622        |
| Logistic EuroSCORE, %              | 16.1 ± 10.5       | 15.6 ± 10.5       | .730        |
| Diabetes mellitus, %               | 22.5/59.4 (37.9)  | 81/204 (39.7)     | .643        |
| Hypertension, %                    | 493/595 (82.9)    | 165/204 (80.9)    | .523        |
| Coronary artery disease, %         | 249/590 (42.2)    | 78/203 (38.4)     | .345        |
| Previous PCI, %                    | 153/595 (25.7)    | 41/204 (20.1)     | .106        |
| Previous CABG, %                   | 73/593 (12.3)     | 23/204 (11.3)     | .695        |
| Chronic kidney disease, %          | 101/431 (23.4)    | 37/133 (27.8)     | .304        |
| Prior atrial fibrillation, %       | 154/560 (27.5)    | 47/188 (25)       | .503        |
| NYHA III-IV, %                     | 319/440 (72.5)    | 110/160 (68.8)    | .368        |
| <i>Echocardiographic findings</i>  |                   |                   |             |
| Aortic peak gradient, mmHg         | 77 [65-91]        | 73 [60-95]        | .366        |
| Aortic mean gradient, mmHg         | 47 [39-56]        | 44 [36-59]        | .307        |
| LVEF, %                            | 60 [52-70]        | 60 [50-65]        | <b>.016</b> |
| Aortic valve area, cm <sup>2</sup> | 0.62 [0.5-0.76]   | 0.64 [0.52-0.8]   | .410        |
| SPPA, mmHg                         | 47.2 ± 16.8       | 49.8 ± 16.6       | .153        |
| Organic etiology of MR             | 396/547 (72.4)    | 113/179 (63.1)    | <b>.019</b> |
| TAPSE, mm                          | 21 [19-23]        | 20 [17-22]        | .597        |

| <i>Procedural/in-hospital outcomes</i> |                |                |             |
|----------------------------------------|----------------|----------------|-------------|
| Valvuloplasty, %                       | 441/569 (77.5) | 162/200 (81)   | .301        |
| Self-expandable device, %              | 459/596 (77)   | 149/204 (73)   | .251        |
| Successful device, %                   | 569/590 (96.4) | 190/203 (93.6) | .084        |
| Need for PPMI, %                       | 134/523 (25.6) | 39/186 (21)    | .204        |
| Persistent LBBB, %                     | 179/386 (46.4) | 63/150 (42)    | .361        |
| NOAF, %                                | 41/386 (10.6)  | 7/142 (4.9)    | <b>.044</b> |

BMI, body mass index; CABG, Coronary artery bypass graft; LBBB, left bundle branch block; LVEF, left ventricular ejection fraction; MR, mitral regurgitation; NOAF, new onset atrial fibrillation; NYHA, New York Heart Association; PCI, percutaneous coronary intervention; PPMI, Permanent pacemaker implantation; SPPA, systolic pressure of pulmonary artery; STS, Society of Thoracic Surgeons; TAPSE, tricuspid annular plane systolic excursion; TR, tricuspid regurgitation.

Data are expressed as mean  $\pm$  standard deviation, No. (%), or median [interquartile range].

**Figure of the supplementary material.** Changes in MR grade depending on baseline TR grade. MR, mitral regurgitation; TR, tricuspid regurgitation.

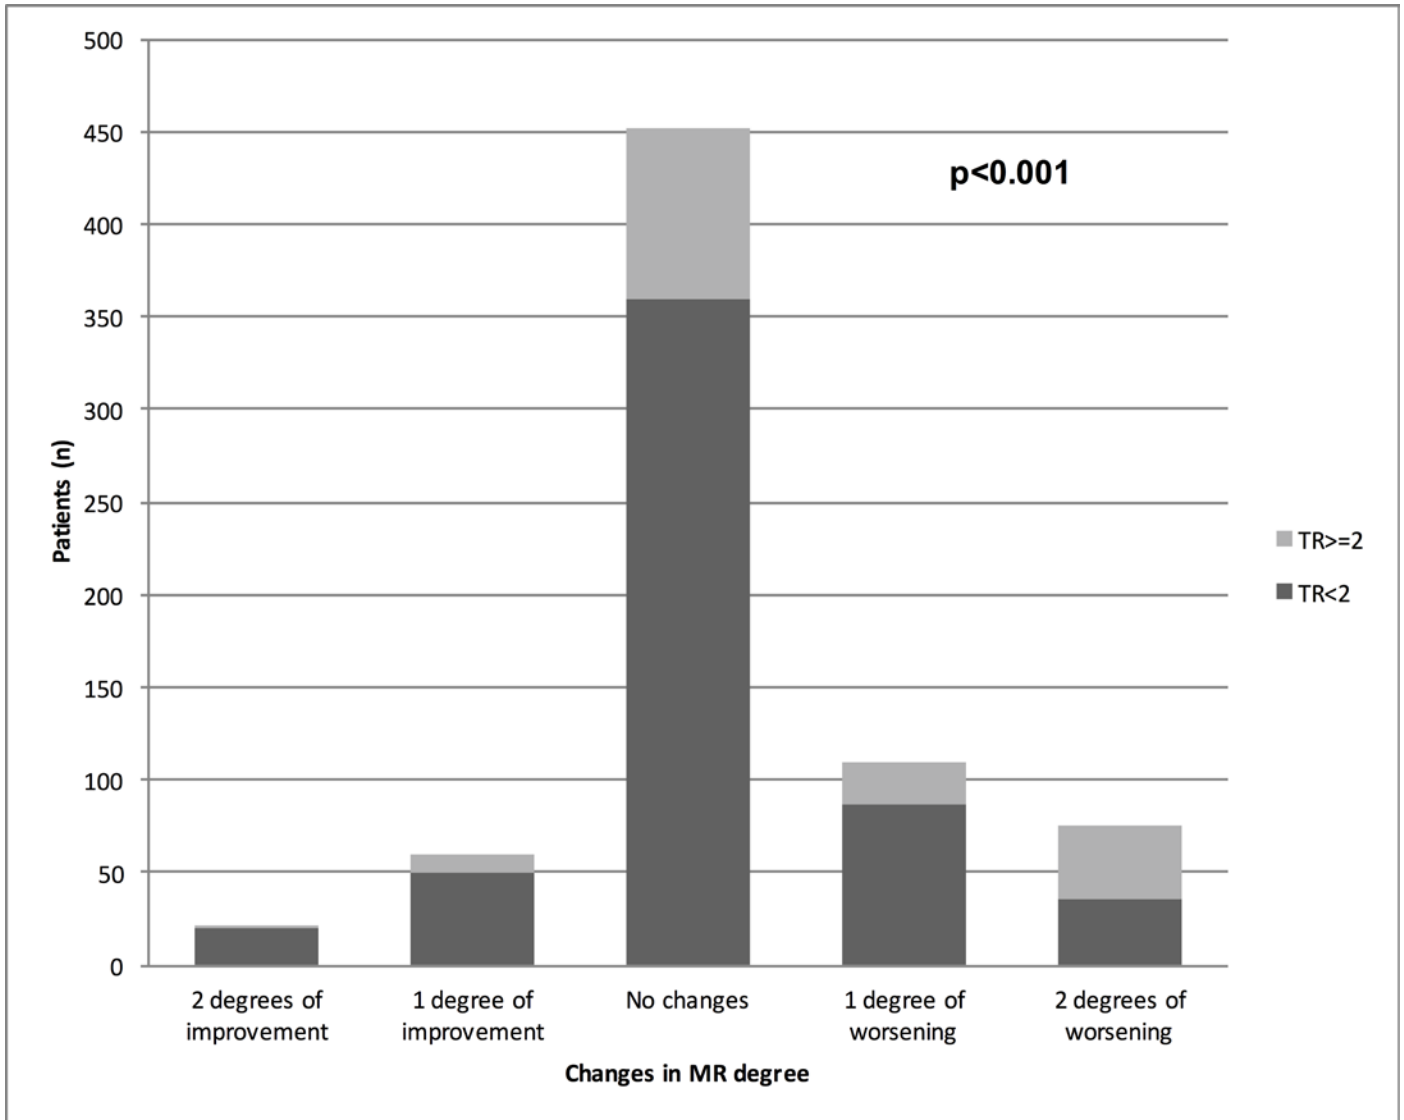

Supplement: mmc1 [file mmc1.pdf]
